# Supplementary material
Source: PubMed Central journal article supplement (PMC8319070)
Supplement: NIHMS1703546-supplement-Supplemental_Figures_and_Tables.pdf [file NIHMS1703546-supplement-Supplemental_Figures_and_Tables.pdf]

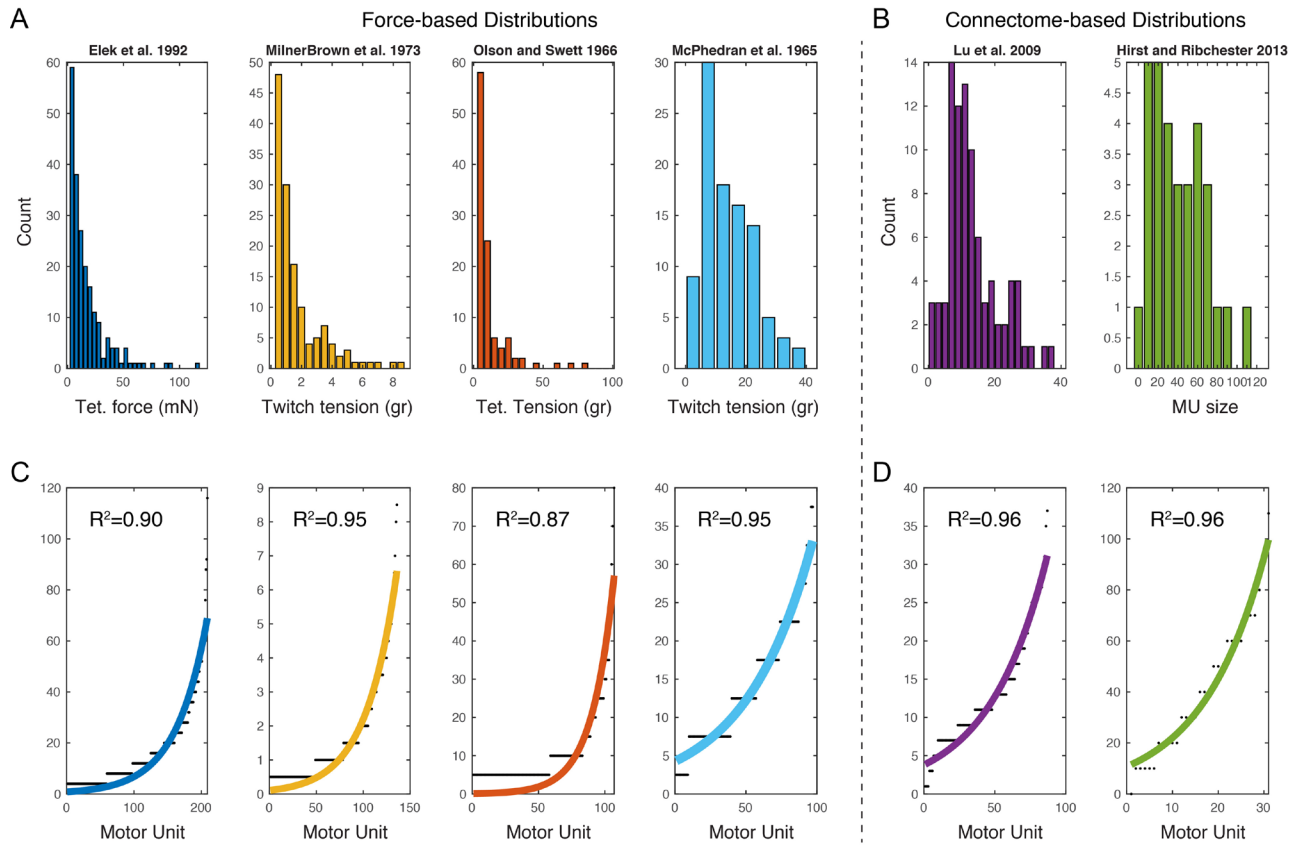

**Figure S1. Force-based and connectome-based MU distributions follow exponential distributions related to Figure 2A.** A - D) Force-based MU size distributions. E - F) connectome-based size distributions. G - L) Accompanying MU number as a function of force step or MU size. We fitted the exponential function:  $y=y_1*\exp(b*x)$ , where  $b=\ln(R)/n$  and  $R=y_{max}/y_1$  using nonlinear curve fitting minimizing least squares.

B9W9, INmean=3.66

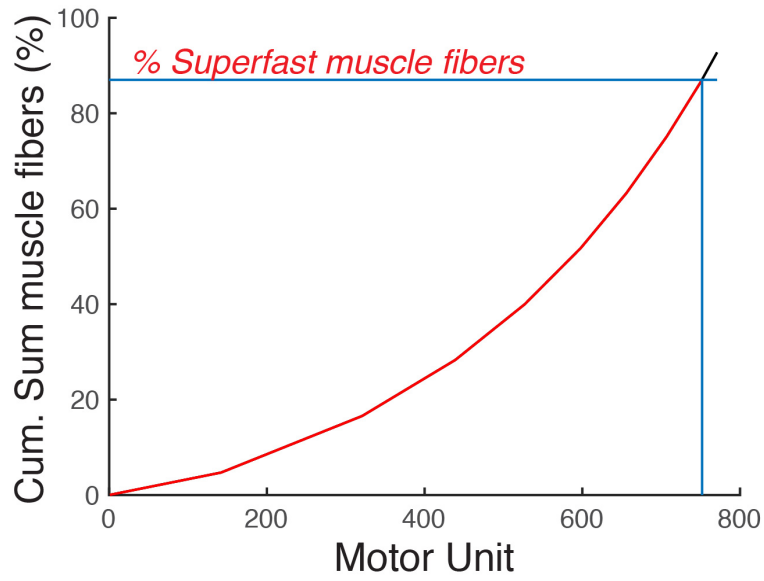

**Figure S2. Cumulative fraction of muscle fibers with MU number allows for MU correction per muscle fiber type related to Figure 2B, 2C.** Of all muscle fibers 87% do not react to the fast myosin antibody my32 [16] and are most likely of the superfast fiber type.

|              | Number of Muscle Fibers |             |   |                           | CSA (mm <sup>2</sup> ) |             |   |                          | CSA / Fiber (μm <sup>2</sup> ) |            |   |                           | Number of NXIIIs Fibers |            |    |                           | Innervation Number 0% Sensory Axons |             |   |                           |
|--------------|-------------------------|-------------|---|---------------------------|------------------------|-------------|---|--------------------------|--------------------------------|------------|---|---------------------------|-------------------------|------------|----|---------------------------|-------------------------------------|-------------|---|---------------------------|
|              | Mean ± SD               | Range       | n | Welch t-test              | Mean ± SD              | Range       | n | Welch t-test             | Mean ± SD                      | Range      | n | Welch t-test              | Mean ± SD               | Range      | n  | Welch t-test              | Mean ± SD                           | Range       | n | Welch t-test              |
| Left         | 3234 ± 232              | 2992 - 3503 | 4 | t (5.4) = -2.8, p = 0.04  | 2.50 ± 0.57            | 1.78 - 3.17 | 4 | t (6) = -0.63, p = 0.55  | 826 ± 167                      | 532 - 905  | 4 | t (6.0) = -0.62, p = 0.56 | 820 ± 187               | 602 - 1162 | 8  | t (10.2) = 0.32, p = 0.76 | 4.47 ± 0.78                         | 3.85 - 5.55 | 4 | t (4.98) = -1.5, p = 0.18 |
| Right        | 3794 ± 334              | 3586 - 4286 | 4 |                           | 2.75 ± 0.58            | 2.29 - 3.54 | 4 |                          | 765 ± 85                       | 638 - 826  | 4 |                           | 790 ± 148               | 677 - 1045 | 5  |                           | 5.2 ± 0.53                          | 4.63 - 5.67 | 3 |                           |
| Sides Pooled | 3514 ± 400              | 2992 - 4286 | 8 |                           | 2.63 ± 0.55            | 1.78 - 3.54 | 8 |                          | 748 ± 126                      | 532 - 905  | 8 |                           | 809 ± 167               | 602 - 1162 | 13 |                           | 4.78 ± 0.75                         | 3.85 - 5.67 | 7 |                           |
| VS Left      | 1045 ± 104              | 922 - 1161  | 4 | t (5.9) = -0.79, p = 0.46 | 1.05 ± 0.19            | 0.87 - 1.31 | 4 | t (4.4) = 0.63, p = 0.56 | 1008 ± 157                     | 795 - 1128 | 4 | t (4.7) = 1.31, p = 0.25  |                         |            |    |                           |                                     |             |   |                           |
| VS Right     | 1107 ± 115              | 946 - 1197  | 4 |                           | 0.99 ± 0.09            | 0.88 - 1.09 | 4 |                          | 894 ± 87                       | 798 - 1000 | 4 |                           |                         |            |    |                           |                                     |             |   |                           |
| Sides Pooled | 1076 ± 107              | 922 - 1197  | 8 |                           | 1.02 ± 0.14            | 0.87 - 1.31 | 8 |                          | 951 ± 132                      | 795 - 1128 | 8 |                           |                         |            |    |                           |                                     |             |   |                           |
| VTB Left     | 706 ± 172               | 486 - 907   | 4 | t (5.5) = -1.1, p = 0.32  | 0.43 ± 0.11            | 0.32 - 0.57 | 4 | t (5.5) = 0.07, p = 0.95 | 641 ± 197                      | 357 - 794  | 4 | t (5.9) = 0.98, p = 0.37  |                         |            |    |                           | 6.77 ± 1.03                         | 5.83 - 8.41 | 4 | t (4.98) = -1.5, p = 0.18 |
| VTB Right    | 824 ± 128               | 686 - 994   | 4 |                           | 0.43 ± 0.15            | 0.22 - 0.56 | 4 |                          | 514 ± 170                      | 314 - 681  | 4 |                           |                         |            |    |                           | 7.89 ± 0.65                         | 7.02 - 8.59 | 3 |                           |
| Sides Pooled | 765 ± 154               | 486 - 994   | 8 |                           | 0.43 ± 0.12            | 0.22 - 0.57 | 8 |                          | 577 ± 183                      | 314 - 794  | 8 |                           |                         |            |    |                           | 7.25 ± 1.13                         | 5.83 - 8.59 | 7 |                           |
| DTB Left     | 382 ± 62                | 291 - 427   | 4 | t (5.6) = -2.1, p = 0.08  | 0.31 ± 0.1             | 0.18 - 0.42 | 4 | t (6) = -0.07, p = 0.95  | 808 ± 177                      | 608 - 1039 | 4 | t (5.8) = 0.9, p = 0.4    |                         |            |    |                           |                                     |             |   |                           |
| DTB Right    | 462 ± 46                | 433 - 531   | 4 |                           | 0.32 ± 0.12            | 0.19 - 0.42 | 4 |                          | 685 ± 211                      | 423 - 928  | 4 |                           |                         |            |    |                           |                                     |             |   |                           |
| Sides Pooled | 422 ± 66                | 291 - 531   | 8 |                           | 0.32 ± 0.1             | 0.18 - 0.42 | 8 |                          | 747 ± 192                      | 423 - 1039 | 8 |                           |                         |            |    |                           |                                     |             |   |                           |

**Table S1. Syringeal muscle and NXIIIs nerve properties in the adult male zebra finch related to Figure 1E, 1F.**

| Individual    | Linear Fit<br>$y = a + bx$ |                 | Exponential Fit<br>$y = Ae^{Bx}$ |                 | $x_0$         |             |
|---------------|----------------------------|-----------------|----------------------------------|-----------------|---------------|-------------|
|               | a                          | b               | A                                | B               | (mN)          | % of VS max |
| 1             | 0.0                        | 5.0             | 8.4                              | 0.22            | 4.57          | 86          |
| 2             | -29.0                      | 27.1            | 16.0                             | 0.42            | 3.42          | 64          |
| 3             | 2.2                        | 25.3            | 55.4                             | 0.17            | 5.78          | >100        |
| 4             | 0.1                        | 57.6            | 114.0                            | 0.19            | 5.38          | >100        |
| 5             | -16.3                      | 17.8            | 46.4                             | 0.13            | 8.80          | >100        |
| mean $\pm$ SD | -8.6 $\pm$ 13.6            | 26.6 $\pm$ 19.4 | 48.0 $\pm$ 41.8                  | 0.23 $\pm$ 0.12 | 5.6 $\pm$ 2.0 |             |

**Table S2. Linear and exponential model fit parameters of force- $f_0$  transformation related to Figure 5C.** The fitted function was of the form:  $\begin{cases} a + bx, x \leq x_0 \\ Ae^{Bx}, x > x_0 \end{cases}$ .
